# Supplementary material
Source: MDPI journal article supplement (https://www.mdpi.com/2076-3417/7/8/778)

## Supplementary materials

# Removal of Crotamiton from Reverse Osmosis Concentrate by a TiO<sub>2</sub>/Zeolite Composite Sheet

Qun Xiang <sup>1</sup>, Shuji Fukahori <sup>2</sup>, Naoyuki Yamashita <sup>3</sup>, Hiroaki Tanaka <sup>3</sup>, and Taku Fujiwara <sup>4,\*</sup>

<sup>1</sup> The United Graduate School of Agricultural Sciences, Ehime University, 3-5-7 Tarumi, Matsuyama, Ehime 790-8566, Japan; s16dre09@s.kochi-u.ac.jp

<sup>2</sup> Paper Industry Innovation Center of Ehime University, 127 Mendoricho Otsu, Shikokuchuo, Ehime 799-0113, Japan; fukahori.shuji.mj@ehime-u.ac.jp

<sup>3</sup> Research Center for Environmental Quality Management, Kyoto University, 1-2 Yumihama, Otsu, Shiga 520-0811, Japan; yamashita@biwa.eqc.kyoto-u.ac.jp (N.Y.), htanaka@biwa.eqc.kyoto-u.ac.jp (H.T.)

<sup>4</sup> Research and Education Faculty, National Sciences Cluster, Agriculture Unit, Kochi University, 200 Monobe Otsu, Nankoku, Kochi 783-8502, Japan; fujiwarat@kochi-u.ac.jp

\* Correspondence: fujiwarat@kochi-u.ac.jp; Tel.: +81-88-864-5163

### Quantitative analysis

The crotamiton concentrations in the aqueous solution were determined using liquid chromatography tandem mass spectrometry (Acquity UPLC-Xevo TQ; Waters, Milford, MA). Separation was achieved using a BEH C18 column (2.1 mm i.d., 150 mm long; Waters). A linear gradient elution was used, starting at 10 % acetonitrile in 0.05 % formic acid (isocratic for 0.5 min) and increasing to 90 % acetonitrile in 0.05 % formic acid at 7 min. The mobile phase flow rate was 0.3 mL/min. A photodiode array detector between the analytical column and the tandem mass spectrometer was operated at a wavelength of 254 nm.

The total organic carbon concentration in each treated solution was determined using a Sievers 900 Laboratory total organic carbon analyzer (GE, Boston, MA). Ion concentrations were determined using a DX-120 ion chromatography system (Dionex, Sunnyvale, CA). The cation analyses were performed using a CS12A column (4 mm i.d., 250 mm length; Dionex) and a mobile phase of 20 mM methanesulfonic acid at a flow rate of 1 mL/min. The anion analyses were performed using an AS12A anionic column (4 mm i.d., 200 mm length; Dionex) and a mobile phase of 2.7 mM Na<sub>2</sub>CO<sub>3</sub> and 0.3 mM NaHCO<sub>3</sub> at a flow rate of 1.5 mL/min.

Conductivity and pH were measured using a portable electrical conductivity meter (CM-31P, DKK-TOA Corporation, Tokyo, Japan) and a portable pH meter (D-51, Horiba; Tokyo, Japan), respectively. Chemical oxygen demand was measured using a chemical oxygen demand analyzer (Hach, Loveland, Colorado). A V-530 ultraviolet-visible spectrophotometer (Jasco. Co., Tokyo, Japan) was used to determine UV absorbance. Alkalinity was measured using a titration method.

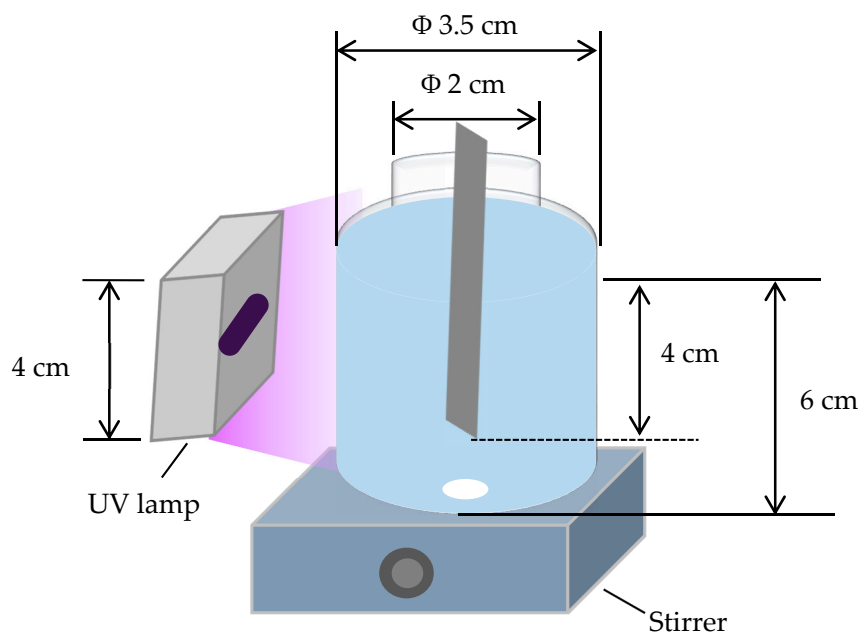

**Figure S1.** The experimental set-up of the adsorption and photocatalytic degradation of crotamiton using the TiO<sub>2</sub>/zeolite composite sheet. The symbol  $\Phi$  refers to the diameter of the vial.

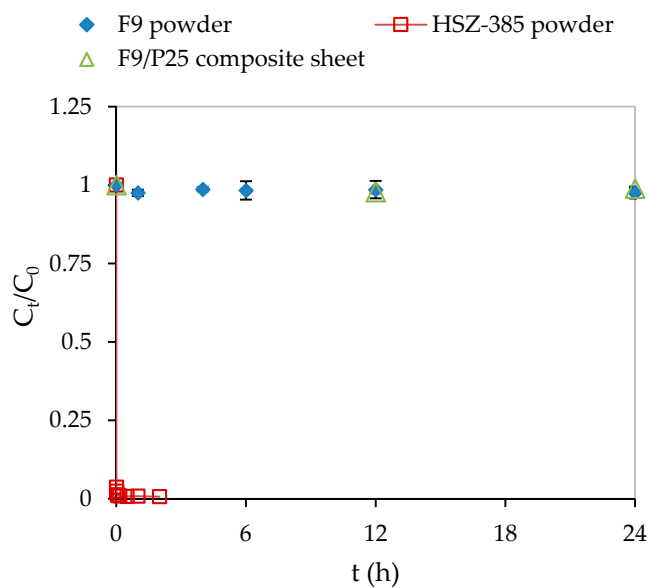

**Figure S2.** Removal of crotamiton from ultrapure water by adsorption using F9 powder, HSZ-385 powder and the F9/P25 composite sheet ( $C_0 = 10$  mg/L,  $V = 50$  mL). The dosage for the powder adsorbent was 0.1 g/L. The F9/P25 composite sheet was  $2 \times 5.5$  cm<sup>2</sup> and submerged at a depth of 4 cm. The composite sheet contained 4 mg F9/cm<sup>2</sup>.

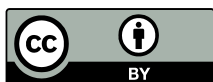

Supplement: s1 [file s1]
